# Supplementary material
Source: PubMed Central journal article supplement (PMC5480292)
Supplement: NIHMS864684-supplement-supplemental_materials.pdf [file NIHMS864684-supplement-supplemental_materials.pdf]

Table S1. ; `mWUbgfi Wi fYg'cb'H Y[ `mWUba ]WcUffUmi gYX'Zcf`UbUmg]g'cZ  
 ]bZi YbnUj]fi gYg

| #  | Structure                                                                           | Sequence                                                                                                                                                                                        |
|----|-------------------------------------------------------------------------------------|-------------------------------------------------------------------------------------------------------------------------------------------------------------------------------------------------|
| 1  | 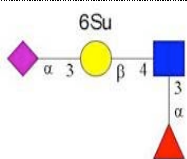   | Neu5Ac $\alpha$ 2-3(6-O-Su)Gal $\beta$ 1-4(Fuca1-3)GlcNAc $\beta$ -Sp8                                                                                                                          |
| 2  |    | Neu5Ac $\alpha$ 2-3Gal $\beta$ 1-3[6OSO3]GalNAc $\alpha$ -Sp8                                                                                                                                   |
| 3  |    | Neu5Ac $\alpha$ 2-3Gal $\beta$ 1-4[6OSO3]GlcNAc $\beta$ -Sp8                                                                                                                                    |
| 4  |    | Neu5Ac $\alpha$ 2-3Gal $\beta$ 1-4(Fuca1-3)(6OSO3)GlcNAc $\beta$ -Sp8                                                                                                                           |
| 5  |    | Neu5Ac $\alpha$ 2-3Gal $\beta$ 1-3(6OSO3)GlcNAc-Sp8                                                                                                                                             |
| 6  |   | Neu5Ac $\alpha$ 2-3Gal $\beta$ 1-3(Neu5Ac $\alpha$ 2-3Gal $\beta$ 1-4)GlcNAc $\beta$ -Sp8                                                                                                       |
| 7  |  | Neu5Ac $\alpha$ 2-3Gal $\beta$ 1-3(Neu5Ac $\alpha$ 2-3Gal $\beta$ 1-4GlcNAc $\beta$ 1-6)GalNAc-Sp14                                                                                             |
| 8  |  | Neu5Ac $\alpha$ 2-3Gal $\beta$ 1-4GlcNAc $\beta$ 1-2Man $\alpha$ 1-3(Neu5Ac $\alpha$ 2-3Gal $\beta$ 1-4GlcNAc $\beta$ 1-2Man $\alpha$ 1-6)Man $\beta$ 1-4GlcNAc $\beta$ 1-4GlcNAc $\beta$ -Sp12 |
| 9  |  | Neu5Ac $\alpha$ 2-3Gal $\beta$ -Sp8                                                                                                                                                             |
| 10 |  | Neu5Ac $\alpha$ 2-3GalNAc $\alpha$ -Sp8                                                                                                                                                         |
| 11 |  | Neu5Ac $\alpha$ 2-3Gal $\beta$ 1-3GalNAc $\alpha$ -Sp8                                                                                                                                          |
| 12 |  | Neu5Ac $\alpha$ 2-3Gal $\beta$ 1-3GlcNAc $\beta$ -Sp0                                                                                                                                           |
| 13 |  | Neu5Ac $\alpha$ 2-3Gal $\beta$ 1-3GlcNAc $\beta$ -Sp8                                                                                                                                           |
| 14 |  | Neu5Ac $\alpha$ 2-3Gal $\beta$ 1-4Glc $\beta$ -Sp0                                                                                                                                              |
| 15 |  | Neu5Ac $\alpha$ 2-3Gal $\beta$ 1-4Glc $\beta$ -Sp8                                                                                                                                              |
| 16 |  | Neu5Ac $\alpha$ 2-3Gal $\beta$ 1-4GlcNAc $\beta$ -Sp0                                                                                                                                           |
| 17 |  | Neu5Ac $\alpha$ 2-3Gal $\beta$ 1-4GlcNAc $\beta$ -Sp8                                                                                                                                           |
| 18 |  | Neu5Ac $\alpha$ 2-3GalNAc $\beta$ 1-4GlcNAc $\beta$ -Sp0                                                                                                                                        |

|    |  |                                                                                                                                                    |
|----|--|----------------------------------------------------------------------------------------------------------------------------------------------------|
| 19 |  | Neu5Ac $\alpha$ 2-3Gal $\beta$ 1-4GlcNAc $\beta$ 1-3Gal $\beta$ 1-4GlcNAc $\beta$ -Sp0                                                             |
| 20 |  | Neu5Ac $\alpha$ 2-3Gal $\beta$ 1-3GlcNAc $\beta$ 1-3Gal $\beta$ 1-3GlcNAc $\beta$ -Sp0                                                             |
| 21 |  | Neu5Ac $\alpha$ 2-3Gal $\beta$ 1-4GlcNAc $\beta$ 1-3Gal $\beta$ 1-4GlcNAc $\beta$ 1-3Gal $\beta$ 1-4GlcNAc $\beta$ -Sp0                            |
| 22 |  | Neu5Ac $\alpha$ 2-3Gal $\beta$ 1-4GlcNAc $\beta$ 1-3Gal $\beta$ 1-3GlcNAc $\beta$ -Sp0                                                             |
| 23 |  | Neu5Ac $\alpha$ 2-3Gal $\beta$ 1-3GalNAc-Sp14                                                                                                      |
| 24 |  | Gal $\beta$ 1-3(Neu5Ac $\alpha$ 2-3Gal $\beta$ 1-4(Fuca1-3)GlcNAc $\beta$ 1-6)GalNAc-Sp14                                                          |
| 25 |  | Neu5Ac $\alpha$ 2-3Gal $\beta$ 1-3(Fuca1-4)GlcNAc $\beta$ -Sp8                                                                                     |
| 26 |  | Neu5Ac $\alpha$ 2-3Gal $\beta$ 1-4(Fuca1-3)GlcNAc $\beta$ -Sp0                                                                                     |
| 27 |  | Neu5Ac $\alpha$ 2-3Gal $\beta$ 1-4(Fuca1-3)GlcNAc $\beta$ -Sp8                                                                                     |
| 28 |  | Neu5Ac $\alpha$ 2-3Gal $\beta$ 1-4(Fuca1-3)GlcNAc $\beta$ 1-3Gal $\beta$ -Sp8                                                                      |
| 29 |  | Neu5Ac $\alpha$ 2-3Gal $\beta$ 1-4(Fuca1-3)GlcNAc $\beta$ 1-3Gal $\beta$ 1-4GlcNAc $\beta$ -Sp8                                                    |
| 30 |  | Neu5Ac $\alpha$ 2-3Gal $\beta$ 1-4(Fuca1-3)GlcNAc $\beta$ 1-3Gal $\beta$ 1-4(Fuca1-3)GlcNAc $\beta$ 1-3Gal $\beta$ 1-4(Fuca1-3)GlcNAc $\beta$ -Sp0 |
| 31 |  | Neu5Ac $\alpha$ 2-3Gal $\beta$ 1-4GlcNAc $\beta$ 1-3Gal $\beta$ 1-4(Fuca1-3)GlcNAc-Sp0                                                             |
| 32 |  | Neu5Ac $\alpha$ 2-3(GalNAc $\beta$ 1-4)Gal $\beta$ 1-4GlcNAc $\beta$ -Sp0                                                                          |
| 33 |  | Neu5Ac $\alpha$ 2-3(GalNAc $\beta$ 1-4)Gal $\beta$ 1-4GlcNAc $\beta$ -Sp8                                                                          |
| 34 |  | Neu5Ac $\alpha$ 2-3(GalNAc $\beta$ 1-4)Gal $\beta$ 1-4Glc $\beta$ -Sp0                                                                             |

|    |  |                                                                                  |
|----|--|----------------------------------------------------------------------------------|
| 35 |  | Galβ1-3GalNAcβ1-4(Neu5Acα2-3)Galβ1-4Glcβ-Sp0                                     |
| 36 |  | Fucα1-2Galβ1-3GalNAcβ1-4(Neu5Acα2-3)Galβ1-4Glcβ-Sp0                              |
| 37 |  | Fucα1-2Galβ1-3GalNAcβ1-4(Neu5Acα2-3)Galβ1-4Glcβ-Sp9                              |
| 38 |  | Neu5Acα2-6Galβ1-4[6OSO3]GlcNAcβ-Sp8                                              |
| 39 |  | 11-OS-G                                                                          |
| 40 |  | 11-OS-Sp8                                                                        |
| 41 |  | Neu5Acα2-6GalNAcα-Sp8                                                            |
| 42 |  | Neu5Acα2-6Galβ-Sp8                                                               |
| 43 |  | Neu5Acα2-6Galβ1-4Glcβ-Sp8                                                        |
| 44 |  | Neu5Acα2-6Galβ1-4GlcNAcβ-Sp0                                                     |
| 45 |  | Neu5Acα2-6Galβ1-4GlcNAcβ-Sp8                                                     |
| 46 |  | Neu5Acα2-6GalNAcβ1-4GlcNAcβ-Sp0                                                  |
| 47 |  | Neu5Acα2-6Galβ1-4GlcNAcβ1-3Galβ1-4GlcNAcβ-Sp0                                    |
| 48 |  | Neu5Acα2-6Galβ1-4GlcNAcβ1-3Galβ1-4(Fucα1-3)GlcNAcβ1-3Galβ1-4(Fucα1-3)GlcNAcβ-Sp0 |
| 49 |  | Galβ1-3(Neu5Acα2-6)GlcNAcβ1-4Galβ1-4Glcβ-Sp10                                    |
| 50 |  | Galβ1-3(Neu5Acα2-6)GalNAcα-Sp8                                                   |
